# Supplementary material for: Effects of Acute Sepsis on Cellular Dynamics and Amyloid Formation in a Mouse Model of Alzheimer’s Disease
Source: MDPI journal article supplement (doi:10.3390/cimb44090262), 2022-08-24
Supplement: s1 [file s1]

**Table S1.** Behavior results of APP animals that were subjected to sepsis.

|              | Open Field Test |      |         |      |               |        |         |        |          |       |         |       | Novel Object Recognition Test |      |         |      |
|--------------|-----------------|------|---------|------|---------------|--------|---------|--------|----------|-------|---------|-------|-------------------------------|------|---------|------|
|              | Speed (cm/s)    |      |         |      | Distance (cm) |        |         |        | Time (s) |       |         |       | D2                            |      |         |      |
|              | Pre             |      | 5 Weeks |      | Pre           |        | 5 Weeks |        | Pre      |       | 5 Weeks |       | Pre                           |      | 5 Weeks |      |
|              | Mean            | SD   | Mean    | SD   | Mean          | SD     | Mean    | SD     | Mean     | SD    | Mean    | SD    | Mean                          | SD   | Mean    | SD   |
| Early Sepsis | 5.73            | 0.72 | 2.87    | 0.87 | 3240.80       | 578.34 | 1512.14 | 534.04 | 160.75   | 27.48 | 110.63  | 87.46 | 0.31                          | 0.09 | 0.17    | 0.17 |
| Late Sepsis  | 4.26            | 0.83 | 3.20    | 1.64 | 3101.23       | 330.75 | 2039.58 | 951.10 | 179.85   | 51.13 | 98.57   | 49.25 | 0.37                          | 0.29 | 0.31    | 0.48 |
| APP Sham     | 5.70            | 1.32 | 7.27    | 1.11 | 3325.93       | 782.28 | 3048.52 | 706.48 | 152.86   | 29.59 | 88.79   | 36.56 | 0.47                          | 0.21 | 0.44    | 0.22 |
| WT Sepsis    | 5.29            | 0.73 | 2.24    | 0.39 | 2944.35       | 459.23 | 1241.17 | 228.81 | 151.11   | 30.08 | 67.01   | 40.14 | 0.52                          | 0.15 | 0.05    | 0.36 |
| WT-Sham      | 5.01            | 1.02 | 4.88    | 0.72 | 2759.25       | 386.94 | 2860.51 | 582.90 | 162.04   | 36.14 | 137.11  | 26.52 | 0.54                          | 0.15 | 0.465   | 0.12 |

**Table S2.** Signal areas measured in the cortex and hippocampus of APP mice that were subjected to sepsis.

|             |              | NeuN (%) |      | GFAP (%) |      | Iba1 (%) |      | Aβ (%) |      |
|-------------|--------------|----------|------|----------|------|----------|------|--------|------|
|             |              | Mean     | SD   | Mean     | SD   | Mean     | SD   | Mean   | SD   |
|             |              |          |      |          |      |          |      |        |      |
| Cortex      | Early Sepsis | 7.04     | 1.73 | 1.94     | 1.11 | 1.22     | 0.80 | 0.36   | 0.17 |
|             | Late Sepsis  | 4.09     | 2.11 | 4.84     | 3.10 | 0.28     | 0.20 | 0.71   | 0.37 |
|             | APP Sham     | 6.69     | 1.25 | 2.77     | 0.47 | 1.31     | 0.15 | 0.29   | 0.23 |
|             | WT Sepsis    | 6.80     | 2.16 | 1.39     | 1.60 | 0.72     | 0.25 | 0      | 0    |
|             | WT-Sham      | 8.14     | 1.19 | 2.35     | 0.53 | 0.97     | 0.15 | 0      | 0    |
| Hippocampus | Early Sepsis | 5.22     | 1.20 | 2.87     | 1.11 | 1.02     | 0.90 | 0.12   | 0.09 |
|             | Late Sepsis  | 3.72     | 2.30 | 5.36     | 2.10 | 0.44     | 0.45 | 0.24   | 0.12 |
|             | APP Sham     | 3.80     | 0.43 | 3.60     | 0.58 | 1.06     | 0.54 | 0.28   | 0.13 |
|             | WT Sepsis    | 3.91     | 1.91 | 3.02     | 2.68 | 0.29     | 0.13 | 0      | 0    |
|             | WT-Sham      | 4.67     | 0.72 | 3.16     | 0.53 | 0.66     | 0.22 | 0      | 0    |

**Table S3.** AQP4 signal area around SMA<sup>+</sup> vessels quantified within a certain distance from the target.

|                                | Cortex |        |         |        |         | Hippocampus |        |         |        |        |
|--------------------------------|--------|--------|---------|--------|---------|-------------|--------|---------|--------|--------|
|                                | 50 μm  | 100 μm | 150 μm  | 200 μm | 250 μm  | 50 μm       | 100 μm | 150 μm  | 200 μm | 250 μm |
| APP-Sham vs. WT-Sepsis - #     | 0,8159 | 0,1191 | <0,0001 | 0,0002 | <0,0001 | 0,7495      | 0,9868 | >0,9999 | 0,6216 | 0,1497 |
| APP-Sham vs. EarlySepsis - \$  | 0,8545 | 0,5295 | <0,0001 | 0,0008 | <0,0001 | 0,9496      | 0,7678 | 0,9748  | 0,9762 | 0,9675 |
| APP-Sham vs. LateSepsis - &    | 0,8732 | 0,7226 | 0,6476  | 0,7484 | 0,7146  | 0,8324      | 0,5988 | 0,4178  | 0,2341 | 0,0474 |
| WT-Sepsis vs. EarlySepsis - *  | 0,9993 | 0,7412 | 0,3303  | 0,9234 | 0,6684  | 0,9547      | 0,5518 | 0,9796  | 0,3366 | 0,04   |
| WT-Sepsis vs. LateSepsis - ‡   | 0,9969 | 0,0041 | <0,0001 | 0,0015 | <0,0001 | 0,9944      | 0,3762 | 0,3997  | 0,938  | 0,9902 |
| EarlySepsis vs. LateSepsis - © | 0,9998 | 0,0509 | 0,001   | 0,0061 | 0,0002  | 0,99        | 0,994  | 0,1593  | 0,0699 | 0,0072 |
